# Supplementary material for: The 68Ga/177Lu theragnostic concept in PSMA targeting of castration-resistant prostate cancer: correlation of SUVmax values and absorbed dose estimates
Source: Springer Nature journal article supplement (doi:10.1007/s00259-016-3609-9), 2017-01-12
Supplement: MOESM2 [file 11994944]

| Supportive Data for Table 4: Semiquantitative Evaluation of <sup>68</sup> Ga-PSMA-HBED-CC PET/CT (SUV <sub>max</sub> -Values) |                |          |                     |      |      |      |      |      |      |     |                       |      |     |      |                     |      |
|-------------------------------------------------------------------------------------------------------------------------------|----------------|----------|---------------------|------|------|------|------|------|------|-----|-----------------------|------|-----|------|---------------------|------|
| Patient                                                                                                                       |                | Prostate | Skeletal metastases |      |      |      |      |      |      |     | Lymph node metastases |      |     |      | Visceral metastases |      |
|                                                                                                                               |                |          | S1                  | S2   | S3   | S4   | S5   | S6   | S7   | S8  | LN1                   | LN2  | LN3 | LN4  |                     |      |
| 1                                                                                                                             | Baseline       | /        | 14.3                | 19.8 | 14   | 8.9  | 12.2 | 5.2  | /    | /   | 21.4                  | 21.4 | 6.7 | /    | /                   | /    |
|                                                                                                                               | After 2 Cycles | /        | 25.3                | 14.9 | 13.3 | 5.8  | 9.1  | 3.5  | /    | /   | 2.7                   | 2.6  | 4.7 | /    | /                   | /    |
|                                                                                                                               | After 3 Cycles | /        | 23.8                | 7.1  | 8.2  | 9.1  | 7.2  | 3.3  | /    | /   | 9.4                   | 8.6  | 5.8 | /    | /                   | /    |
|                                                                                                                               | Dose (Gy/GBq)  | /        | /                   | /    | /    | /    | 1.2  | /    | /    | /   | /                     | /    | /   | /    | /                   | /    |
| 2                                                                                                                             | Baseline       | /        | 13.2                | 9.7  | 38.3 | 32.1 | 21.6 | 24.1 | 11.7 | /   | /                     | /    | /   | /    | /                   | /    |
|                                                                                                                               | After 2 Cycles | /        | 1.1                 | 2.3  | 30.8 | 8.1  | 7.9  | 3.1  | 5.5  | /   | /                     | /    | /   | /    | /                   | /    |
|                                                                                                                               | After 3 Cycles | /        | /                   | /    | /    | /    | /    | /    | /    | /   | /                     | /    | /   | /    | /                   | /    |
|                                                                                                                               | Dose (Gy/GBq)  | /        | /                   | /    | /    | /    | /    | /    | /    | /   | /                     | /    | /   | /    | /                   | /    |
| 3                                                                                                                             | Baseline       | /        | 14.6                | 14.5 | 21.0 | 20.2 | 18.2 | 20.2 | /    | /   | 22                    | 20.2 | 29  | 12.3 | /                   | /    |
|                                                                                                                               | After 2 Cycles | /        | 7.7                 | 13.1 | 14.4 | 13.2 | 8.3  | 9.3  | /    | /   | 5.5                   | 2.8  | 8   | 2.1  | /                   | /    |
|                                                                                                                               | After 3 Cycles | /        | 13.3                | 19.2 | 13.9 | 8.9  | 5.3  | 11.2 | /    | /   | 2.7                   | 2.7  | 3.9 | 2.5  | /                   | /    |
|                                                                                                                               | Dose (Gy/GBq)  | /        | /                   | 4.0  | /    | /    | /    | /    | /    | /   | /                     | /    | /   | /    | /                   | /    |
| 4                                                                                                                             | Baseline       | 21.6     | 8.9                 | 7.1  | 11.6 | 10.1 | 19.5 | 4.8  | 2    | 7.6 | /                     | /    | /   | /    | /                   | /    |
|                                                                                                                               | After 2 Cycles | 7.4      | 2.9                 | 2.3  | 17.8 | 2.3  | 6.4  | 2.5  | 7.5  | 1.5 | /                     | /    | /   | /    | /                   | /    |
|                                                                                                                               | After 3 Cycles | 7.4      | 1.4                 | 1.7  | 23.2 | 1.7  | 3.8  | 1.7  | 7.2  | 3.2 | /                     | /    | /   | /    | /                   | /    |
|                                                                                                                               | Dose (Gy/GBq)  | /        | 2.4                 | /    | /    | 2.2  | /    | /    | /    | /   | /                     | /    | /   | /    | /                   | /    |
| 5                                                                                                                             | Baseline       | 14.8     | 15                  | 13.4 | 6    | 6    | 7.6  | /    | /    | /   | 4.1                   | /    | /   | /    | /                   | /    |
|                                                                                                                               | After 2 Cycles | 5.9      | 6.4                 | 8.5  | 5.2  | 3.8  | 4    | /    | /    | /   | 1.2                   | /    | /   | /    | /                   | /    |
|                                                                                                                               | After 3 Cycles | 5.8      | 8.7                 | 6.3  | 6.7  | 2.3  | 3    | /    | /    | /   | 1.1                   | /    | /   | /    | /                   | /    |
|                                                                                                                               | Dose (Gy/GBq)  | /        | 5.9                 | /    | /    | /    | /    | /    | /    | /   | /                     | /    | /   | /    | /                   | /    |
| 6                                                                                                                             | Baseline       | /        | 25.5                | 27.7 | /    | /    | /    | 37.9 | /    | /   | 16                    | /    | /   | /    | 32.3                | 24.8 |
|                                                                                                                               | After 2 Cycles | /        | 24.1                | 30.5 | /    | /    | /    | 32   | /    | /   | 21.8                  | /    | /   | /    | 40.5                | 28.0 |
|                                                                                                                               | After 3 Cycles | /        | 21.9                | 20.4 | /    | /    | /    | 23.9 | /    | /   | 22.5                  | /    | /   | /    | 24.7                | 24.7 |

|    |                |      |      |      |      |      |      |      |      |   |      |      |      |     |      |      |
|----|----------------|------|------|------|------|------|------|------|------|---|------|------|------|-----|------|------|
|    | Dose (Gy/GBq)  | /    | /    | 1.7  | /    | /    | /    | 2.9  | /    | / | /    | /    | /    | /   | /    | /    |
| 7  | Baseline       | /    | 17.7 | 30.6 | 32.6 | 29.7 | /    | /    | /    | / | /    | /    | /    | /   | 16.9 | /    |
|    | After 2 Cycles | /    | 8    | 14   | 28.6 | 24.7 | /    | /    | /    | / | /    | /    | /    | /   | 12.2 | /    |
|    | After 3 Cycles | /    | 5.7  | 13.1 | 24.7 | 12.9 | /    | /    | /    | / | /    | /    | /    | /   | 14.6 | /    |
|    | Dose (Gy/GBq)  | /    | 7.5  | /    | /    | 7.5  | /    | /    | /    | / | /    | /    | /    | /   | 3.3  | /    |
| 8  | Baseline       | 13.3 | 13.4 | 7.4  | 10.8 | 7.6  | 11.6 | 11.2 | 7.9  | / | /    | /    | /    | /   | /    | /    |
|    | After 2 Cycles | 8.9  | 8.4  | 16.4 | 11.9 | 17   | 9.8  | 15.6 | 10.4 | / | /    | /    | /    | /   | /    | /    |
|    | After 3 Cycles | /    | /    | /    | /    | /    | /    | /    | /    | / | /    | /    | /    | /   | /    | /    |
|    | Dose (Gy/GBq)  | /    | /    | 2.6  | /    | 2.5  | /    | 9.7  | /    | / | /    | /    | /    | /   | /    | /    |
| 9  | Baseline       | 34.8 | 36.9 | 31.5 | 19.8 | 27.5 | /    | /    | /    | / | /    | /    | /    | /   | 16.7 | 31.5 |
|    | After 2 Cycles | 12.2 | 26.7 | 9.8  | 11.8 | 14.2 | /    | /    | /    | / | /    | /    | /    | /   | 15.3 | 20.2 |
|    | After 3 Cycles | /    | /    | /    | /    | /    | /    | /    | /    | / | /    | /    | /    | /   | /    | /    |
|    | Dose (Gy/GBq)  | /    | /    | 1.1  | /    | /    | /    | /    | /    | / | /    | /    | /    | /   | /    | 2.4  |
| 10 | Baseline       | /    | 21.5 | 74.4 | 33.6 | 13.1 | /    | /    | /    | / | 24.2 | 26.7 | 26.7 | 8.1 | /    | /    |
|    | After 2 Cycles | /    | 24.6 | 48.3 | 36.9 | 16.5 | /    | /    | /    | / | 12.4 | 16.7 | 14.6 | 6.2 | /    | /    |
|    | After 3 Cycles | /    | /    | /    | /    | /    | /    | /    | /    | / | /    | /    | /    | /   | /    | /    |
|    | Dose (Gy/GBq)  | /    | /    | /    | /    | 2.8  | /    | /    | /    | / | 2.3  | /    | /    | /   | /    | /    |
