# Supplementary material for: The 68Ga/177Lu theragnostic concept in PSMA targeting of castration-resistant prostate cancer: correlation of SUVmax values and absorbed dose estimates
Source: Springer Nature journal article supplement (doi:10.1007/s00259-016-3609-9), 2017-01-12
Supplement: MOESM3 [file 11994944]

**Supportive Data for Table 5: Semi-Quantitative Parotid and Submandibular Glands Uptake SUV<sub>max</sub>**

|                 |                | SUVmax                 |                        |                         |                         | VOLUME (ml)            |                        |                         |                         | CUMULATED DOSE (Gy/GBq) |              |
|-----------------|----------------|------------------------|------------------------|-------------------------|-------------------------|------------------------|------------------------|-------------------------|-------------------------|-------------------------|--------------|
|                 |                | SUV 1<br>(parotis re.) | SUV 2<br>(parotis li.) | SUV 3<br>(submand. re.) | SUV 4<br>(submand. li.) | VOL 1<br>(parotis re.) | VOL 2<br>(parotis li.) | VOL 3<br>(submand. re.) | VOL 4<br>(submand. li.) | Gl. Parotis             | Gl. Submand. |
| <b>1. F.E</b>   | Baseline       | 30.6                   | 21.4                   | 20                      | 19.3                    | 27.4                   | 26.6                   | 9.5                     | 7.8                     | 0.4                     | 0.5          |
|                 | After 3 cycles | 16.1                   | 14.8                   | 11.2                    | 11.7                    | 21.6                   | 21.2                   | 9                       | 7                       |                         |              |
| <b>2. R.G.</b>  | Baseline       | 14.2                   | 14.6                   | 17.9                    | 15.7                    | 29.4                   | 29.05                  | 7.8                     | 7.33                    | 0.6                     | 0.5          |
|                 | After 3 cycles | 10.8                   | 10.3                   | 13.1                    | 9.6                     | 23.5                   | 21                     | 5                       | 7.2                     |                         |              |
| <b>3. H.W.</b>  | Baseline       | 10.2                   | 8.5                    | 11.8                    | 13.1                    | 24.2                   | 25.1                   | 10.2                    | 7.9                     | 0.3                     | 0.7          |
|                 | After 3 cycles | 8.8                    | 8.1                    | 13.9                    | 13.8                    | 19.9                   | 22.1                   | 7                       | 6.7                     |                         |              |
| <b>4. H.M.</b>  | Baseline       | 11.3                   | 9.2                    | 10.3                    | 10.4                    | 16.2                   | 21.3                   | 9.8                     | 9                       | 0.5                     | 0.2          |
|                 | After 3 cycles | 11.6                   | 8.8                    | 10.9                    | 10.4                    | 14.1                   | 15.8                   | 9.2                     | 9                       |                         |              |
| <b>5. F.K.</b>  | Baseline       | 7.7                    | 8                      | 8.5                     | 8.2                     | 29.9                   | 21.6                   | 8.3                     | 6.6                     | 0.8                     | 0.7          |
|                 | After 3 cycles | 10.8                   | 9.3                    | 10.6                    | 9.9                     | 22                     | 17.6                   | 6.4                     | 5.9                     |                         |              |
| <b>6. R.J.</b>  | Baseline       | 16                     | 19.6                   | 25.1                    | 21.2                    | 22.1                   | 22.6                   | 9.3                     | 10.4                    | 0.9                     | 0.6          |
|                 | After 3 cycles | 10.2                   | 10.5                   | 14.6                    | 13.8                    | 20.5                   | 22.5                   | 7.6                     | 8.8                     |                         |              |
| <b>7. C.H.</b>  | Baseline       | 15.8                   | 14.1                   | 18.3                    | 16.7                    | 18.8                   | 19                     | 8.8                     | 9.8                     | 0.5                     | 0.6          |
|                 | After 3 cycles | 16.2                   | 17.7                   | 18.8                    | 17.7                    | 17.5                   | 14.1                   | 7.5                     | 8.6                     |                         |              |
| <b>8. S.E.</b>  | Baseline       | 7.6                    | 7.4                    | 8.1                     | 10                      | 36.7                   | 31.3                   | 6.9                     | 7.7                     | 1.0                     | 0.4          |
|                 | After 2 cycles | 7.4                    | 6.6                    | 7.4                     | 7.5                     | 28.3                   | 23.7                   | 5.8                     | 6.4                     |                         |              |
| <b>9. G.J.</b>  | Baseline       | 5.8                    | 10.3                   | 7.1                     | 6.9                     | 27.2                   | 24.2                   | 8.2                     | 6.5                     | 0.4                     | /            |
|                 | After 3 cycles | 13.5                   | 4                      | 5.4                     | 4.1                     | 15.5                   | 19.1                   | 8.1                     | 6.4                     |                         |              |
| <b>10. S.R.</b> | Baseline       | 7.4                    | 8.2                    | 9.1                     | 9.7                     | 19                     | 28                     | 11                      | 9.7                     | 0.4                     | 0.4          |
|                 | After 3 cycles | 18.1                   | 19.3                   | 15.7                    | 19.3                    | 29                     | 29                     | 13.7                    | 10.2                    |                         |              |
